# Supplementary material for: Microwave-assisted hydrolysis of biomass over activated carbon supported polyoxometalates
Source: Royal Society of Chemistry journal article supplement (doi:10.1039/c6ra28778f), 2017-01-01
Supplement: c6ra28778f1.pdf [file c6ra28778f1.pdf]

Supplementary information

**Microwave-assisted hydrolysis of biomass over activated carbon supported polyoxometalate**

Shuntaro Tsubaki <sup>a</sup>, Kiriyo Oono <sup>b</sup>, Ayumu Onda <sup>b</sup>, Tadaharu Ueda <sup>c</sup>, Tomohiko Mitani <sup>d</sup>, Masanori Hiraoka <sup>e</sup>

<sup>a</sup> Department of Chemical Science and Engineering, School of Materials and Chemical Technology, Tokyo Institute of Technology, 2-12-1, Ookayama, Meguro, Tokyo, 152-8550, Japan.

<sup>b</sup> Research Laboratory of Hydrothermal Chemistry, Faculty of Science, Kochi University, Akebono-cho 2-5-1, Kochi City, Kochi 780-8520, Japan.

<sup>c</sup> Department of Marine Resource Science, Marine Resources and Environmental Course, Kochi University, Akebono-cho 2-5-1, Kochi, Japan.

<sup>d</sup> Research Institute for Sustainable Humanosphere, Kyoto University, Gokasho, Uji, 611-0011, Japan.

<sup>e</sup> Usa Marine Biological Institute, Kochi University, Inoshiri, Usa, Tosa, Kochi 781-1164, Japan.

Table S1. Leaching rate of SiW (%) after hydrolysis of cellobiose.

| POM – pretreatment<br>(type of AC)  | SiW leaching<br>rate (%) |
|-------------------------------------|--------------------------|
| SiW – None (type D)                 | 7.8                      |
| SiW – HCl (type D)                  | 8.3                      |
| SiW – LiCl (type D)                 | 4.6                      |
| SiW – NaCl (type D)                 | 5.6                      |
| SiW – KCl (type D)                  | 7.1                      |
| SiW – CsCl (type D)                 | 6.6                      |
| SiW – TBAB (type D)                 | 5.3                      |
| SiW – NH <sub>4</sub> Cl (type D)   | 8.4                      |
| SiW – HNO <sub>3</sub> 10% (type D) | 22                       |
| SiW – HNO <sub>3</sub> 20% (type D) | 22                       |
| SiW – None (type E)                 | 14                       |
| SiW – HCl (type E)                  | 8.3                      |
| SiW – None (type F)                 | 16                       |
